# Supplementary material
Source: PubMed Central journal article supplement (PMC11229122)
Supplement: media-1.pdf [file media-1.pdf]

## Extended Figures: Legends and statistics

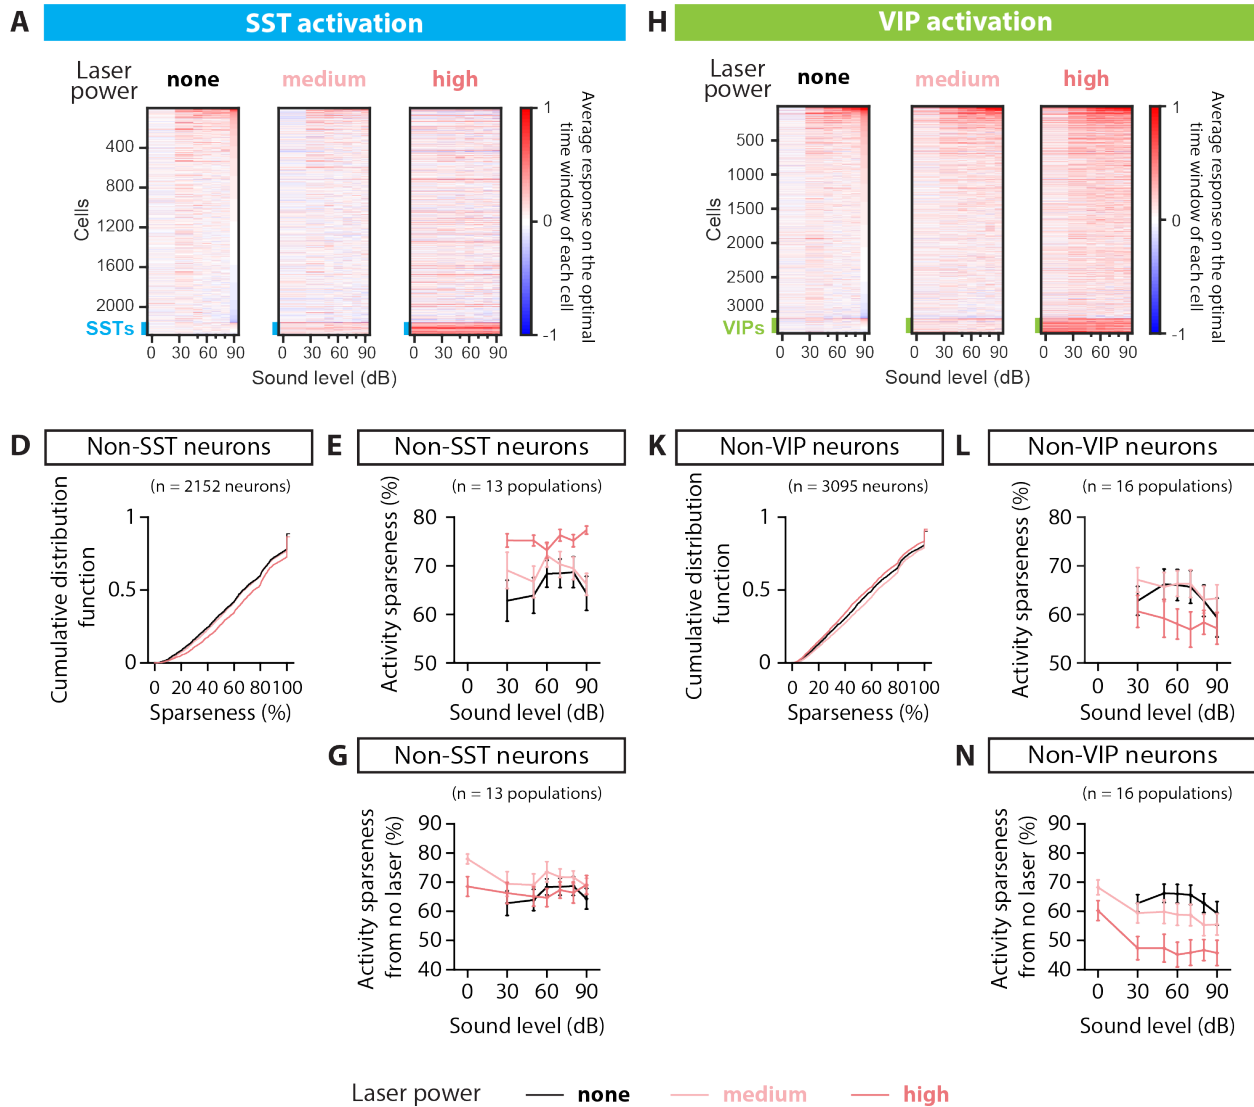

Extended Figure 2.1. Panels A, D, E, G, H, K, L, N of Figure 2 computed on a fixed [0 1] sec window instead of the optimal window.

| EXTENDED FIGURE 2.1            |                |                                       |      |                                          |                               |                             |
|--------------------------------|----------------|---------------------------------------|------|------------------------------------------|-------------------------------|-----------------------------|
| Sparseness with SST activation | Ext. Fig 2.2 D | None: 2020<br>Med: 2019<br>High: 1980 | GLME | $t_{\text{laser}}=6.01$<br><br>DF = 5676 | *** $p_{\text{laser}}=1.9e-9$ | $h_{\text{laser}}^2=5.9e-3$ |

|                                                                     |                |                                       |      |                                                                                                         |                                                                                                            |                                                                                                 |
|---------------------------------------------------------------------|----------------|---------------------------------------|------|---------------------------------------------------------------------------------------------------------|------------------------------------------------------------------------------------------------------------|-------------------------------------------------------------------------------------------------|
| Activity sparseness with SST activation                             | Ext. Fig 2.2 E | 13 populations                        | GLME | $t_{\text{laser}}=3.06$<br>$t_{\text{sound}}=0.93$<br>$t_{\text{laser:sound}}=-0.56$<br><br>DF = 230    | <b>**<math>p_{\text{laser}}=2.5e-3</math></b><br>$p_{\text{sound}}=0.35$<br>$p_{\text{laser:sound}}=0.57$  | $h_{\text{laser}}^2=0.19$<br>$h_{\text{sound}}^2=1.4e-2$<br>$h_{\text{laser:sound}}^2=1.2e-2$   |
| Activity sparseness from 0dB and no laser power with SST activation | Ext. Fig 2.2 G | 13 populations                        | GLME | $t_{\text{laser}}=0.31$<br>$t_{\text{sound}}=0.74$<br>$t_{\text{laser:sound}}=-0.23$<br><br>DF = 230    | $p_{\text{laser}}=0.76$<br>$p_{\text{sound}}=0.46$<br>$p_{\text{laser:sound}}=0.82$                        | $h_{\text{laser}}^2=2.4e-3$<br>$h_{\text{sound}}^2=8.3e-3$<br>$h_{\text{laser:sound}}^2=2.1e-3$ |
| Sparseness with VIP activation                                      | Ext. Fig 2.2 K | None: 2997<br>Med: 3002<br>High: 3023 | GLME | $t_{\text{laser}}=-3.11$<br><br>DF = 8442                                                               | <b>**<math>p_{\text{laser}}=1.8e-3</math></b>                                                              | $h_{\text{laser}}^2=9.3e-4$                                                                     |
| Activity sparseness with VIP activation                             | Ext. Fig 2.2 L | 16 populations                        | GLME | $t_{\text{laser}}=-1.46$<br>$t_{\text{sound}}=-0.97$<br>$t_{\text{laser:sound}}=5.1e-4$<br><br>DF = 284 | $p_{\text{laser}}=0.14$<br>$p_{\text{sound}}=0.33$<br>$p_{\text{laser:sound}}=0.99$                        | $h_{\text{laser}}^2=3.1e-2$<br>$h_{\text{sound}}^2=8.6e-3$<br>$h_{\text{laser:sound}}^2=6.0e-9$ |
| Activity sparseness from 0dB and no laser power with VIP activation | Ext. Fig 2.2 N | 16 populations                        | GLME | $t_{\text{laser}}=-5.54$<br>$t_{\text{sound}}=-1.45$<br>$t_{\text{laser:sound}}=0.58$<br><br>DF = 284   | <b>***<math>p_{\text{laser}}=7.0e-8</math></b><br>$p_{\text{sound}}=0.15$<br>$p_{\text{laser:sound}}=0.56$ | $h_{\text{laser}}^2=0.22$<br>$h_{\text{sound}}^2=1.2e-2$<br>$h_{\text{laser:sound}}^2=4.7e-3$   |

Extended Table 2.1: Statistics table for extended figure panels 2.2, with the average response computed on a fixed [0-1] sec window instead of the optimal window (as in Figure 2 D, E, G, K, L, N).

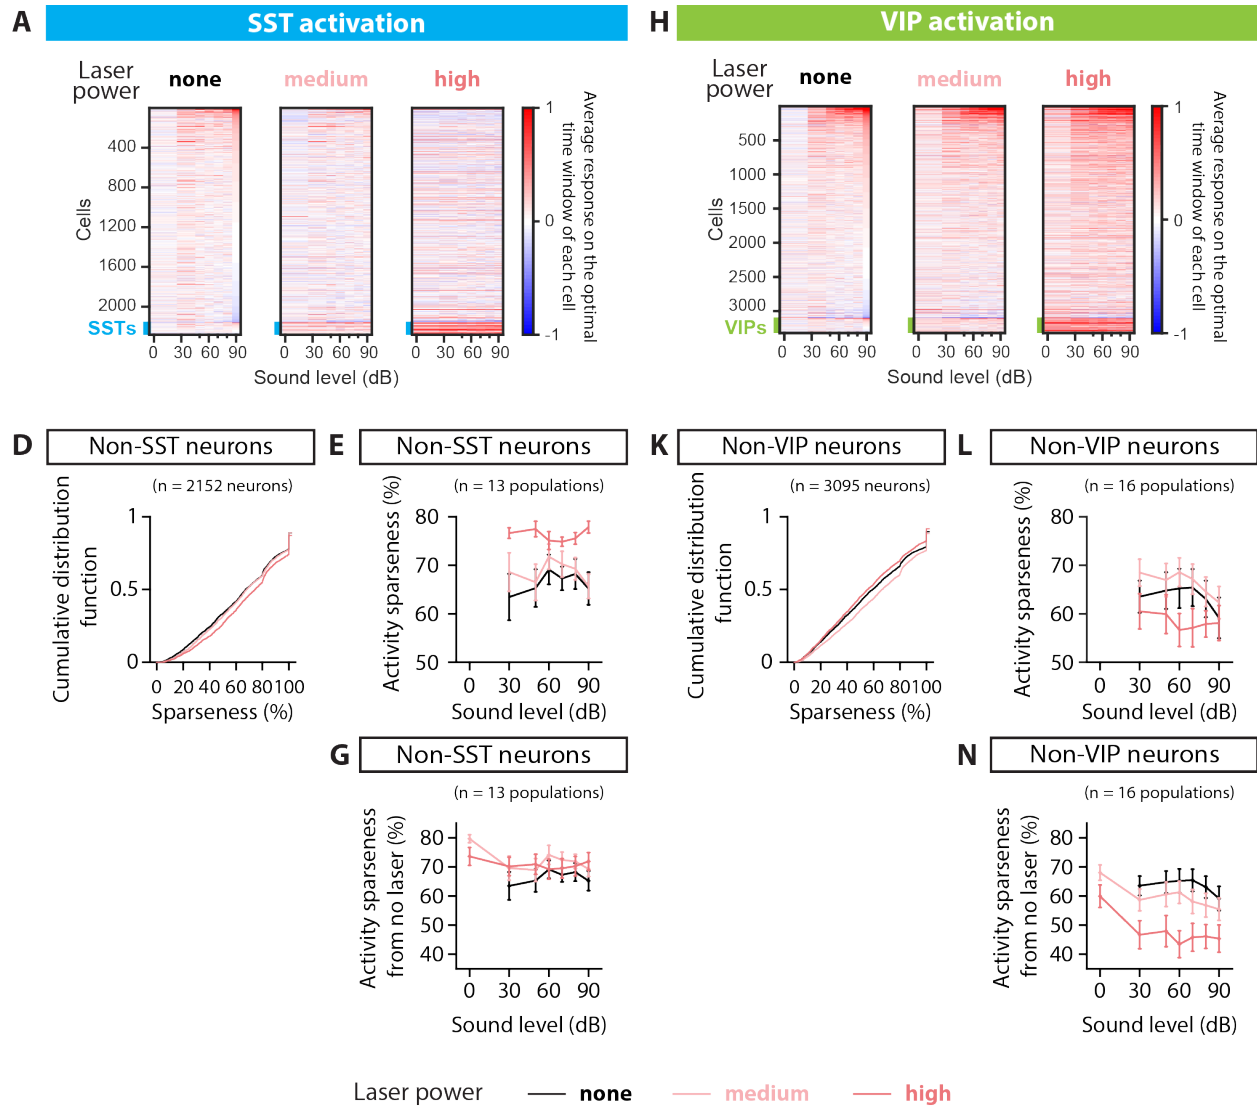

Extended Figure 2.2 : Panels A, D, E, G, H, K, L, N of Figure 2 computed on the fixed sec window as described in the Methods instead of the optimal window.

| EXTENDED FIGURE 2.2                     |                |                                       |      |                                                                                      |                                                                                          |                                                                                               |
|-----------------------------------------|----------------|---------------------------------------|------|--------------------------------------------------------------------------------------|------------------------------------------------------------------------------------------|-----------------------------------------------------------------------------------------------|
| Sparseness with SST activation          | Ext. Fig 2.1 D | None: 2033<br>Med: 2029<br>High: 1994 | GLME | $t_{\text{laser}}=5.21$<br><br>DF = 5702                                             | *** $p_{\text{laser}}=2.0e-7$                                                            | $h_{\text{laser}}^2=4.5e-3$                                                                   |
| Activity sparseness with SST activation | Ext. Fig 2.1 E | 13 populations                        | GLME | $t_{\text{laser}}=3.20$<br>$t_{\text{sound}}=0.87$<br>$t_{\text{laser:sound}}=-0.79$ | ** $p_{\text{laser}}=1.6e-3$<br>$p_{\text{sound}}=0.38$<br>$p_{\text{laser:sound}}=0.43$ | $h_{\text{laser}}^2=0.22$<br>$h_{\text{sound}}^2=1.3e-2$<br>$h_{\text{laser:sound}}^2=2.5e-2$ |

|                                                                     |                |                                       |      |                                                                                                       |                                                                                                            |                                                                                                 |
|---------------------------------------------------------------------|----------------|---------------------------------------|------|-------------------------------------------------------------------------------------------------------|------------------------------------------------------------------------------------------------------------|-------------------------------------------------------------------------------------------------|
|                                                                     |                |                                       |      | DF = 230                                                                                              |                                                                                                            |                                                                                                 |
| Activity sparseness from 0dB and no laser power with SST activation | Ext. Fig 2.1 G | 13 populations                        | GLME | $t_{\text{laser}}=1.39$<br>$t_{\text{sound}}=0.84$<br>$t_{\text{laser:sound}}=-0.48$<br><br>DF = 230  | $p_{\text{laser}}=0.17$<br>$p_{\text{sound}}=0.40$<br>$p_{\text{laser:sound}}=0.63$                        | $h_{\text{laser}}^2=3.9e-2$<br>$h_{\text{sound}}^2=9.0e-3$<br>$h_{\text{laser:sound}}^2=7.3e-3$ |
| Sparseness with VIP activation                                      | Ext. Fig 2.1 K | None: 2979<br>Med: 2921<br>High: 3020 | GLME | $t_{\text{laser}}=-2.78$<br><br>DF = 8350                                                             | <b>**<math>p_{\text{laser}}=5.5e-3</math></b>                                                              | $h_{\text{laser}}^2=7.0e-4$                                                                     |
| Activity sparseness with VIP activation                             | Ext. Fig 2.1 L | 16 populations                        | GLME | $t_{\text{laser}}=-1.46$<br>$t_{\text{sound}}=-1.18$<br>$t_{\text{laser:sound}}=0.17$<br><br>DF = 284 | $p_{\text{laser}}=0.15$<br>$p_{\text{sound}}=0.24$<br>$p_{\text{laser:sound}}=0.86$                        | $h_{\text{laser}}^2=2.8e-2$<br>$h_{\text{sound}}^2=1.2e-2$<br>$h_{\text{laser:sound}}^2=6.4e-4$ |
| Activity sparseness from 0dB and no laser power with VIP activation | Ext. Fig 2.1 N | 16 populations                        | GLME | $t_{\text{laser}}=-5.37$<br>$t_{\text{sound}}=-1.38$<br>$t_{\text{laser:sound}}=0.60$<br><br>DF = 284 | <b>***<math>p_{\text{laser}}=1.7e-7</math></b><br>$p_{\text{sound}}=0.17$<br>$p_{\text{laser:sound}}=0.55$ | $h_{\text{laser}}^2=0.19$<br>$h_{\text{sound}}^2=9.7e-3$<br>$h_{\text{laser:sound}}^2=4.6e-3$   |

Extended Table 2.2: Statistics table for extended figure panels 2.1, with the average response computed on the fixed window as described in the Methods instead of the optimal window (as in Figure 2 D, E, G, K, L, N).
